# Supplementary material for: High-fat and high-cholesterol diet decreases phosphorylated inositol-requiring kinase-1 and inhibits autophagy process in rat liver
Source: PubMed Central journal article supplement (PMC6715744; doi:10.1038/s41598-019-48973-w), 2019-08-29
Supplement: 41598_2019_48973_MOESM1_ESM.pdf [file 41598_2019_48973_MOESM1_ESM.pdf]

Title: High-fat and high-cholesterol diet decreases phosphorylated inositol-requiring kinase-1 and inhibits autophagy process in rat liver

Author List: Hisao Naito, Yuki Yoshikawa-Bando, Yuan Yuan, Sayuki Hashimoto, Kazuya Kitamori, Hiroshi Yatsuya, Tamie Nakajima

Supplementary information table 1. Control diet ingredients

---

| Per 100 g of control diet |        |
|---------------------------|--------|
| Crude protein             | 20.8 g |
| Crude lipid               | 4.8 g  |
| Crude fiber               | 3.2 g  |
| Crude ash                 | 5.0 g  |
| Moisture                  | 8.0 g  |
| Carbohydrate              | 58.2 g |

---

|                      |         |
|----------------------|---------|
| Vitamin A            | 1000 IU |
| Vitamin D3           | 200 IU  |
| Vitamin E            | 5.0 mg  |
| Vitamin K3           | 0.5 mg  |
| Vitamin B1           | 1.0 mg  |
| Vitamin B2           | 1.1 mg  |
| Vitamin B12          | 1.7 µg  |
| Niacin               | 10.0 mg |
| Calcium pantothenate | 1.6 mg  |
| Folic acid           | 0.1 mg  |
| Biotin               | 0.03 µg |
| Choline              | 0.23 g  |
| Inositol             | 900 mg  |

---

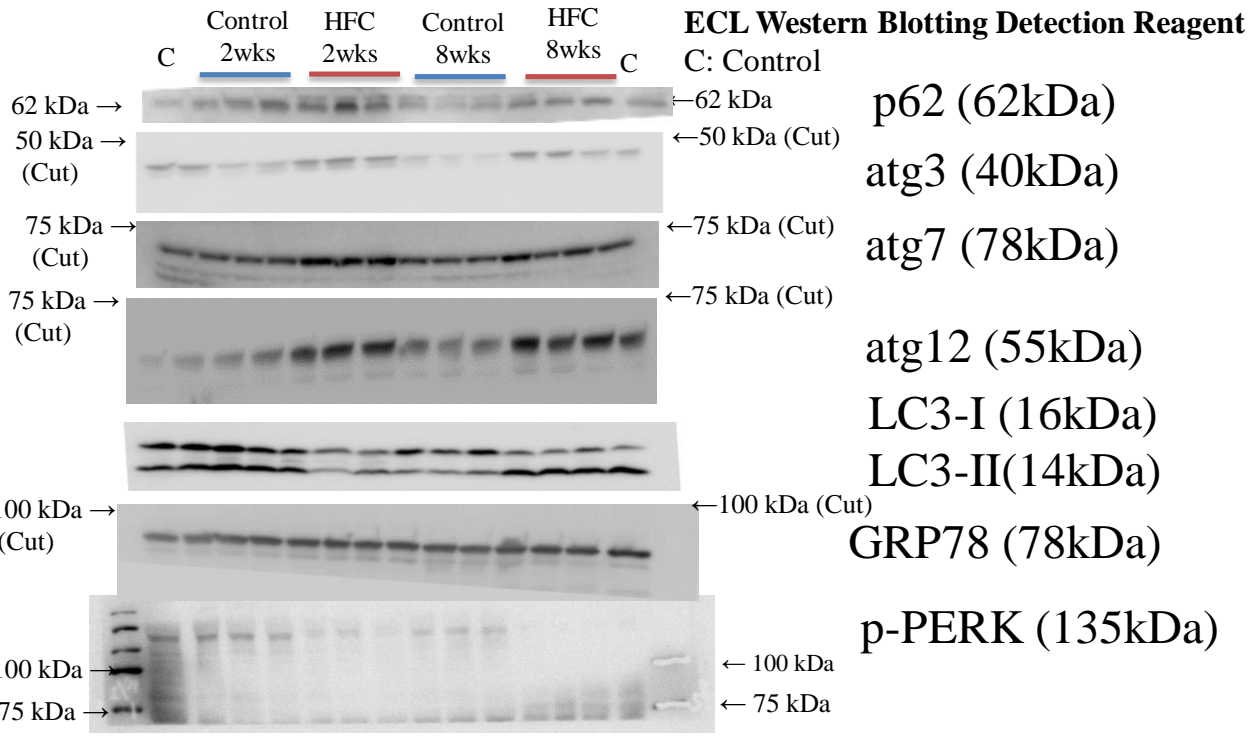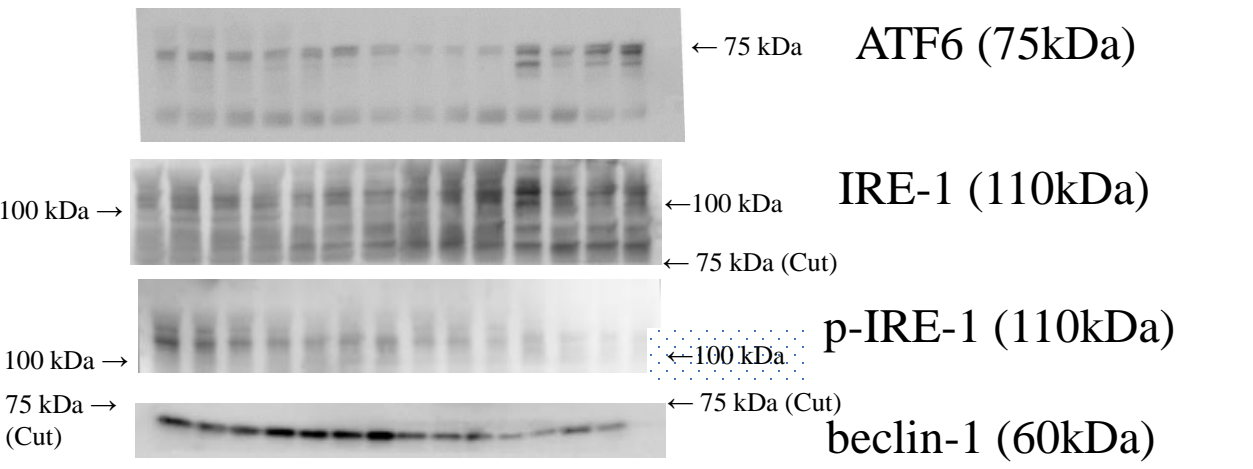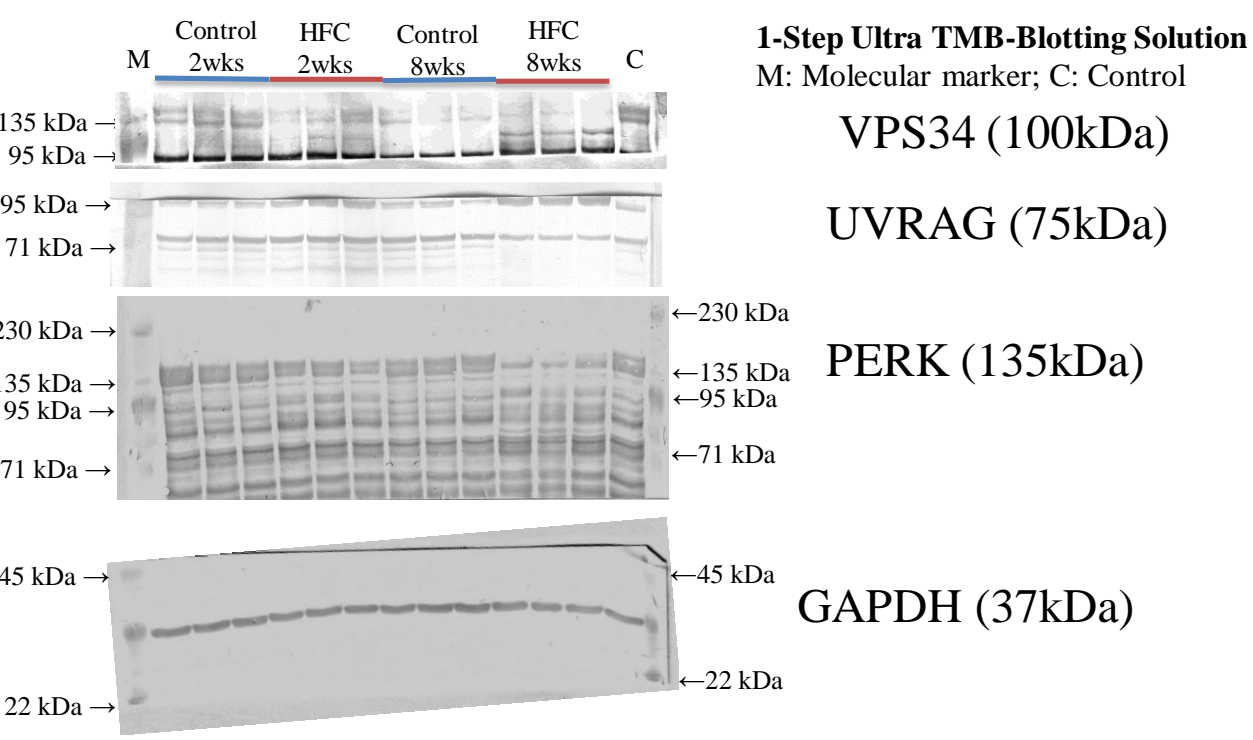

71 kDa →
